# Supplementary material for: Exploring the role of pyroptosis in shaping the tumor microenvironment of colorectal cancer by bulk and single-cell RNA sequencing
Source: PubMed Central journal article supplement (PMC10193704; doi:10.1186/s12935-023-02897-8), 2023-05-18
Supplement: 12935_2023_2897_MOESM2_ESM.pdf [file 12935_2023_2897_MOESM2_ESM.pdf]

**Supplementary table 1.** Clinical baseline of CRC samples.

| Clinical information      | GEO (training group) | TCGA (validation group) |
|---------------------------|----------------------|-------------------------|
|                           | n=556                | n=515                   |
| <b>Age (years)</b>        |                      |                         |
| ≤ 65                      | 222                  | 228                     |
| > 65                      | 333                  | 287                     |
| Unknow                    | 1                    | 0                       |
| <b>Gender</b>             |                      |                         |
| Male                      | 307                  | 280                     |
| Female                    | 249                  | 235                     |
| <b>Pathological stage</b> |                      |                         |
| I                         | 32                   | 91                      |
| II                        | 258                  | 193                     |
| III                       | 203                  | 142                     |
| IV                        | 59                   | 74                      |
| Unknow                    | 4                    | 15                      |
| <b>T</b>                  |                      |                         |
| T1                        | 11                   | 15                      |
| T2                        | 44                   | 91                      |
| T3                        | 360                  | 351                     |
| T4                        | 117                  | 57                      |
| Unknow                    | 24                   | 1                       |
| <b>N</b>                  |                      |                         |
| N0                        | 295                  | 301                     |
| N1                        | 131                  | 125                     |
| N2                        | 104                  | 88                      |
| Unknow                    | 26                   | 1                       |
| <b>M</b>                  |                      |                         |
| M0                        | 474                  | 385                     |
| M1                        | 60                   | 73                      |
| Unknow                    | 22                   | 57                      |
